# Supplementary material for: Essential Genes of Vibrio anguillarum and Other Vibrio spp. Guide the Development of New Drugs and Vaccines
Source: Frontiers journal article supplement (doi:10.3389/fmicb.2021.755801), 2021-10-20
Supplement: Data_Sheet_1.PDF [file Data_Sheet_1.PDF]

[illegible]
